# Supplementary material
Source: PubMed Central journal article supplement (PMC5430214)
Supplement: EMBJ-36-1379-s001.pdf [file EMBJ-36-1379-s001.pdf]

## Expanded View Figures

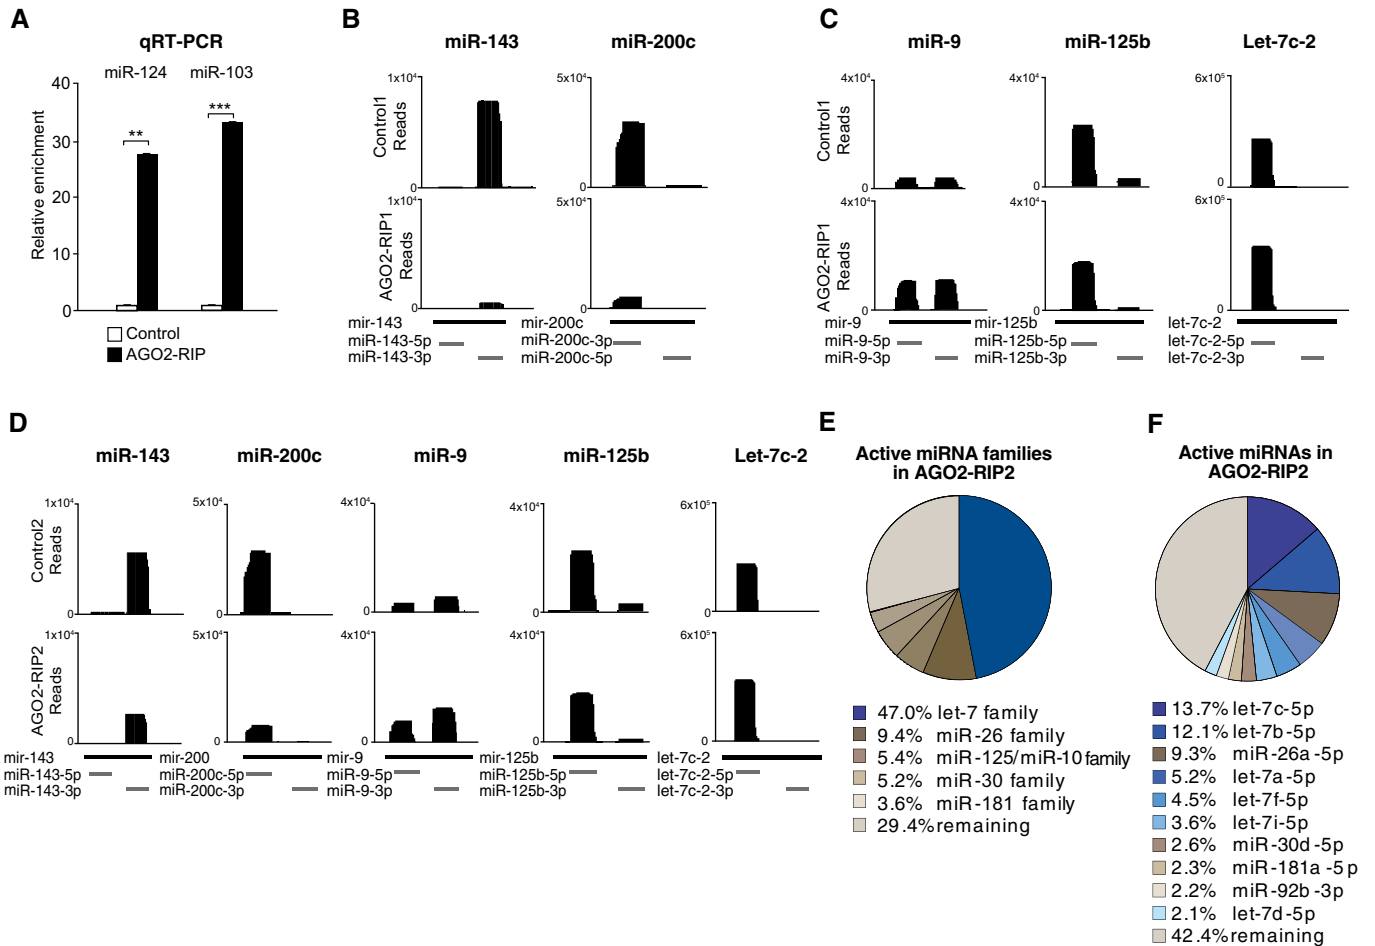

**Figure EV1. Validation of RIP-seq on new-born neurons of the OB.**

- A qRT-PCR analysis showed that miRNAs are enriched in GFP-AGO2 RIP samples compared to sham-injected control samples;  $n = 4$ .
- B Reads mapping to glia-enriched miR-143 and miR-200c in control (upper panel) and GFP-AGO2 RIP samples (lower panel).
- C Reads mapping to miR-9, miR-125b, and let-7c in control (upper panel)- and LV.GFP-AGO2-injected mice (lower panel).
- D Reads mapping to miR-143, miR-200c, miR-9, miR-125b, let-7c in an independent replicate of the GFP-AGO2 RIP.
- E Pie chart of active miRNA families in new-born neurons in the AGO2-RIP2 from an independent replicate. Percentage of reads mapping to miRNA families are shown for the five most abundant miRNA families.
- F Pie chart of active individual miRNAs in new-born neurons in the AGO2-RIP2 from an independent replicate. Percentage of reads mapping to miRNAs are shown for the ten most abundant miRNAs.

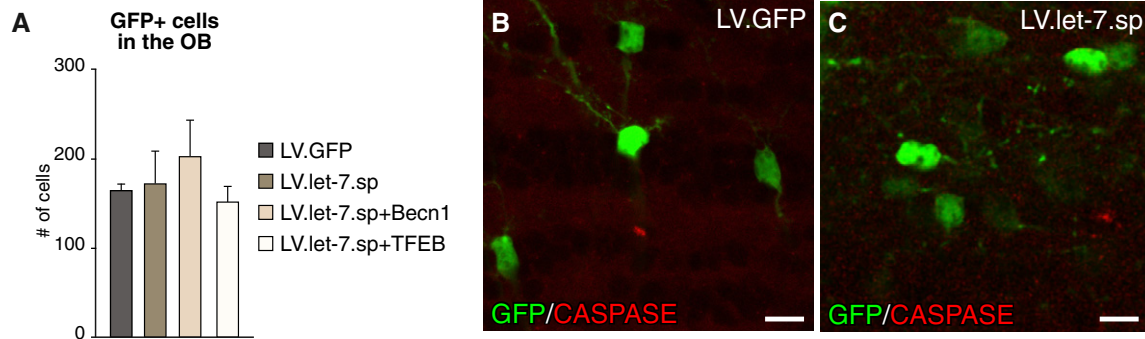

**Figure EV2. Quantification of GFP-positive cells in the OB and caspase-3 staining.**

A Total numbers of GFP-positive new-born neurons in the OB of LV.let-7.sp ( $n = 4$  animals)-, LV.GFP ( $n = 4$  animals)-, LV.let-7.sp + LV.Becn1 ( $n = 3$  animals)-, and LV.let-7.sp + LV.TFEB ( $n = 3$  animals)-injected brains. Data are presented as mean  $\pm$  SEM.

B, C Caspase-3 staining on LV.let-7.sp- and LV.GFP-injected brains showed no differences between the two conditions. Scale bars: 10  $\mu$ m.

**Figure EV3. let-7 positively regulates autophagy by targeting autophagy-related genes.**

A Previously identified let-7 targets in the amino acid-sensing pathway are marked with a star. Graphic is adapted from Dubinsky *et al* (2014).

B Genes in the amino acid-sensing pathway are expressed in the OB shown by qRT-PCR ( $n = 3$ ).

C LC3 staining was conducted to identify and validate autophagic structures in the OB using electron microscopy. Gold particles are indicated with white arrows. Scale bars: 200 nm.

D Pictures for the quantification of autophagic structures were taken in close vicinity to the nuclei of GFP-positive cells. Nuclei are indicated with a star. Scale bars: 5  $\mu$ m.

E Electron microscopy picture showing gold particles in the nucleus of a let-7.sp-expressing new-born neuron in the OB. Gold particles are highlighted with white arrows. Scale bar: 200 nm.

F Electron microscopy analysis and quantifications showed a decrease in the number of autophagosomes (APs) and late autophagic vesicles (AVs) in LV.let-7.sp-injected animals [ $n = 210$  (two animals)] compared to LV.GFP control animals [ $n = 132$  (three animals)].

Data information: Data are presented as mean  $\pm$  SEM; unpaired, two-tailed  $t$ -test, \*\*\* $P < 0.001$ .

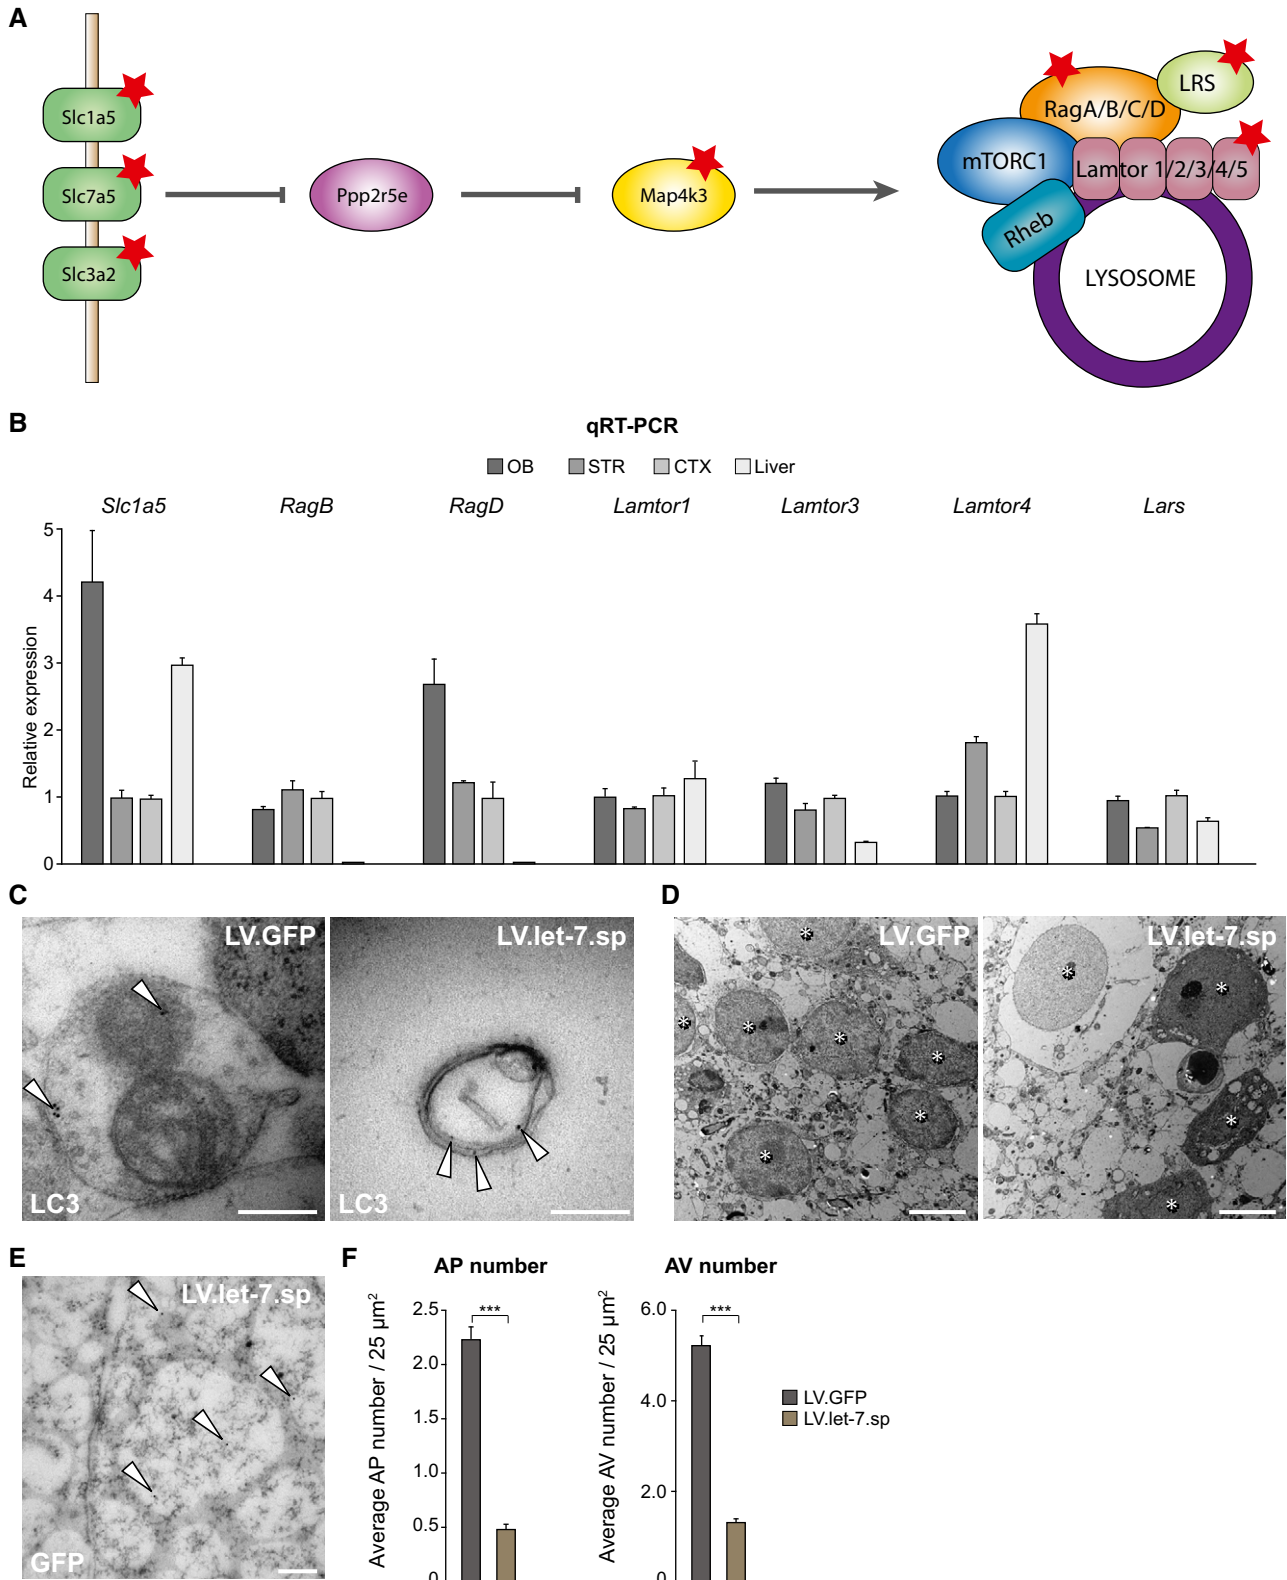

Figure EV3.

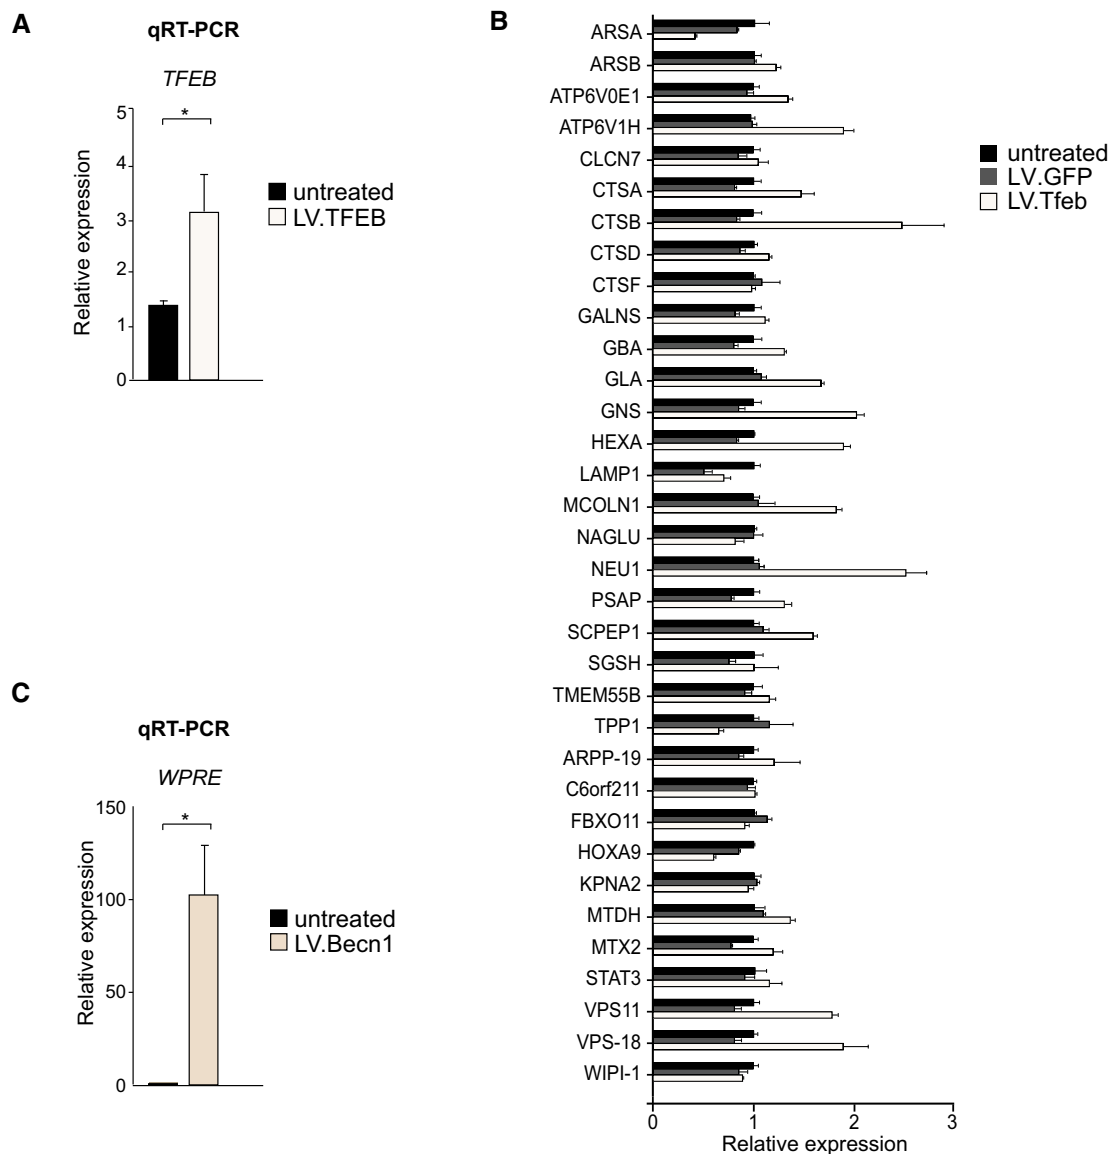

**Figure EV4. Validation of LV.TFEB- and LV.Becn1-overexpressing constructs.**

A Levels of *TFEB* in mouse neural progenitor cells upon LV.TFEB transduction shown by qRT-PCR;  $n = 2$ .  
 B Levels of lysosome- and autophagy-related genes upon LV.TFEB transduction of 293T cells shown by qRT-PCR;  $n = 3$ .  
 C Levels of WPRE sequence upon LV.Becn1 transduction of mouse neural progenitor cells shown by qRT-PCR;  $n = 2$ .

Data information: Data are presented as mean  $\pm$  SEM; unpaired, two-tailed t-test,  $*P < 0.05$ .
